# Supplementary material
Source: PubMed Central journal article supplement (PMC6312019)
Supplement: 2018.196279.SASSE_SUPPL.pdf [file 2018.196279.SASSE_SUPPL.pdf]

**Programmed cell death protein-1 (PD-1)-expression in the microenvironment of classical Hodgkin lymphoma at relapse during anti-PD-1-treatment**

Stephanie Sasse,<sup>1</sup> Katharina Reddemann,<sup>2</sup> Arjan Diepstra,<sup>3</sup> Ilske Oschlies,<sup>2</sup> Antje Schnitter,<sup>2</sup> Sven Borchmann,<sup>1,4,5</sup> Andreas Engert,<sup>1</sup> Peter Borchmann<sup>1</sup> and Wolfram Klapper<sup>2</sup>

<sup>1</sup>First Department of Internal Medicine and German Hodgkin Study Group, University Hospital of Cologne, Germany; <sup>2</sup>Department of Pathology, Hematopathology Section, University Hospital Schleswig-Holstein, Christian-Albrechts-University, Kiel, Germany; <sup>3</sup>Department of Pathology and Medical Biology, University of Groningen, University Medical Centre Groningen, the Netherlands; <sup>4</sup>Center for Molecular Medicine, University Hospital of Cologne, and <sup>5</sup>Elsa Kröner Forschungskolleg Cologne, University of Cologne, Germany

\*SS and KR contributed equally to this work.

Correspondence: [stephanie.sasse@uk-koeln.de](mailto:stephanie.sasse@uk-koeln.de)  
doi:10.3324/haematol.2018.196279

Supplemental table 1: Results of immunohistochemical stainings of Hodgkin- and Reed/Sternberg- as well as microenvironmental cells

| Patient no. | year | tissue type     | cHL subtype | Immunoprofile of the HRSCs |      |      |     |      |                   |       |     |                     |        |     | microenvironment* |       |      |       |       |      |
|-------------|------|-----------------|-------------|----------------------------|------|------|-----|------|-------------------|-------|-----|---------------------|--------|-----|-------------------|-------|------|-------|-------|------|
|             |      |                 |             | CD30                       | CD15 | CD20 | CD3 | PAX5 | EBER              | PD1L1 | PD1 | HLA II (DP, DQ, DR) | HLA DM | β2M | HC10              | PD1L1 | PD1  | CD3   | CD4   | CD8  |
| 1           | 2011 | lymph node      | wsub/ns     | +                          | +    | -    | -   | +    | ND (LMP negative) | 80%   | -   | ND                  | ND     | ND  | ND                | 12,6  | 0    | 116,7 | 32,3  | 37,7 |
|             | 2015 | bone marrow     | wsub/ns     | +                          | +    | -    | -   | +    | ND (LMP negative) | 80%   | -   | ND                  | ND     | ND  | ND                | 42,7  | 0    | 71,7  | 3,7   | 60,3 |
|             | 2017 | lymph node      | wsub        | +                          | +    | -    | NE  | +    | ND (LMP negative) | 100%  | -   | ND                  | ND     | ND  | ND                | 6,3   | 4    | NE    | 8,7   | 62,5 |
| 2           | 2015 | lymph node      | lydepl      | +                          | +/-  | -    | -   | +    | -                 | 100%  | -   | -                   | -      | -   | -                 | 39,3  | 0    | 23,3  | 3     | 16,3 |
|             | 2017 | lymph node      | lydepl      | +                          | +    | -/+  | -   | +    | -                 | 100%  | -   | +                   | -      | -   | -                 | 12,6  | 39,7 | 155   | 72    | 15,3 |
| 3           | 2010 | lymph node      | ns          | +                          | -    | -/+  | -   | +    | -                 | 90%   | -   | ND                  | ND     | ND  | ND                | 40,3  | 0    | 148,3 | NE    | NE   |
|             | 2015 | bronchus biopsy | wsub        | +                          | -    | -    | -   | +    | -                 | 80%   | -   | ND                  | ND     | ND  | ND                | 30,3  | 0    | 223,3 | NE    | NE   |
| 4           | 2015 | lymph node      | mix         | +                          | +    | -    | NE  | +    | -                 | 100%  | -   | +/-                 | -      | -   | -                 | 21,7  | 2    | ND    | 32,3  | 51,6 |
|             | 2017 | lymph node      | wsub        | +                          | +    | -    | -   | +    | -                 | 50%   | -   | NE                  | NE     | -   | +                 | 25,3  | 0    | 123   | 146   | 28,6 |
| 5           | 2007 | lymph node      | mix         | +                          | +    | -    | -   | ND   | -                 | 80%   | -   | ND                  | ND     | ND  | ND                | 15,3  | 7,6  | 221   | NE    | NE   |
|             | 2017 | liver           | wsub        | +                          | +/-  | ND   | ND  | +    | -                 | NE    | NE  | -                   | NE     | -   | NE                | NE    | NE   | ND    | ND    | ND   |
|             | 2017 | liver           | wsub        | +                          | ND   | -    | ND  | NE   | -                 | NE    | NE  | -                   | NE     | NE  | NE                | NE    | NE   | NE    | NE    | NE   |
| 6           | 2013 | lymph node      | wsub        | +                          | NE   | -    | -   | +    | -                 | 100%  | -   | ND                  | ND     | ND  | ND                | 11,3  | 0    | 84,7  | ND    | ND   |
|             | 2017 | bronchus biopsy | wsub        | +                          | +    | -    | -   | +    | -                 | 100%  | -   | ND                  | ND     | ND  | ND                | NE    | 0    | 34    | NE    | 9,3  |
| 7           | 2014 | soft tissue     | mix         | +                          | +/-  | -    | -   | +    | -                 | 100%  | -   | ND                  | ND     | ND  | ND                | 50,7  | 18,7 | 212   | 180   | 51,3 |
|             | 2017 | lymph node      | wsub        | +                          | +    | -    | -   | +    | -                 | 100%  | -   | ND                  | ND     | ND  | ND                | 21,3  | 67   | 239   | NE    | 67   |
| 8           | 2012 | lymph node      | mix         | +                          | -    | -/+  | -   | +    | -                 | 100%  | -   | ND                  | ND     | ND  | ND                | NE    | 0    | 218,7 | 219   | 29,7 |
|             | 2014 | soft tissue     | wsub/ns     | +                          | -    | -    | -   | +/-  | -                 | 100%  | -   | ND                  | ND     | ND  | ND                | 25,3  | 0    | 171,3 | 223,6 | 29   |
|             | 2017 | lymph node      | lyrich      | +                          | -    | -    | -   | +    | -                 | 90%   | -   | ND                  | ND     | ND  | ND                | 35,3  | 71,3 | 124,3 | 93    | 31   |
| 9           | 2016 | lymph node      | ns          | +                          | -/+  | -    | -   | +    | ND (LMP negative) | 50%   | -   | ND                  | ND     | ND  | ND                | NE    | 5    | 91,6  | 81,6  | 22   |
|             | 2018 | bone marrow     | wsub        | +                          | -    | -    | ND  | +    | ND (LMP negative) | 90%   | -   | ND                  | ND     | ND  | ND                | NE    | 22   | ND    | 53    | 20   |

cHL: classic Hodgkin lymphoma; wsub: without subtyping; wsub/ns: without subtyping due to small size of biopsy but with severe sclerosis; ns: nodular sclerosis cHL; lydepl: Lymphocyte depleted cHL; mix: mixed-cellularity cHL; lyrich: Lymphocyte-rich cHL; +: all cells positive; +/-: most cells positive; -/+ : few cells positive, -: all cells negative; NE: not evaluable; ND: not done; EBER: Epstein-Barr virus encoding RNA (detection by in situ-hybridisation), LMP: Epstein-Barr virus latent membrane protein 1; HLA: human leucocyte antigene; β2M: Beta-2-microglobulin; HC10: heavy chain 10 (HLA I); \*total number of PD1, PD1L1, CD3, CD8 and CD4 positive microenvironmental cells was counted in three high-power fields (HPF, 1000-fold magnification using oil immersion), given here is the average value which was used for further analysis. HPF was chosen with at least one HRSC in the center in order to analyze

Supplemental Figure 1

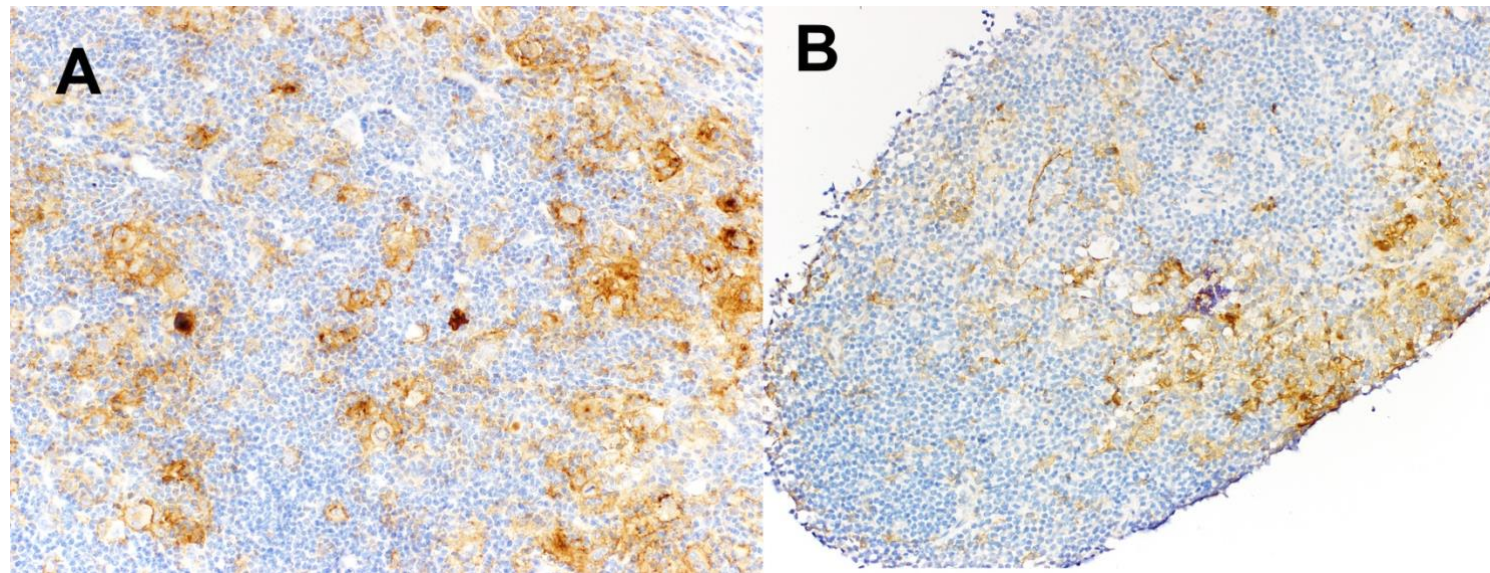

Supplemental figure 1:

PD-L1 staining in patient 4 who appeared to have a slight reduction in PD-L1 staining of the HRSC between pre- (A) and post-treatment biopsy (Original magnification 200x)
